# Supplementary material
Source: publisher figshare collection journal article supplement (https://tandf.figshare.com/articles/dataset/_/5683741)
Supplement: Supplementary file 1 [file 1]

# Mitochondrial DNA reveals the natal origin of *Caretta caretta* (Testudines: Cheloniidae) stranded or by-caught along the Southwestern Adriatic coasts

Andrea Splendiani<sup>1</sup>, Tatiana Fioravanti<sup>1</sup>, Massimo Giovannotti<sup>1</sup>, Antonella D'Amore<sup>1</sup>, Giovanni Furi<sup>2</sup>, Giovanni Totaro<sup>2</sup>, Paola Nisi Cerioni<sup>1</sup>, Alessandro Lucchetti<sup>3</sup>, Vincenzo Caputo Barucchi<sup>1,3,\*</sup>

<sup>1</sup> *Dipartimento di Scienze della Vita e dell'Ambiente (DiSVA), Università Politecnica delle Marche, Via Brecce Bianche, 60131 Ancona, Italy;* <sup>2</sup> *Centro Recupero Tartarughe Marine di Legambiente (CRTM), Manfredonia, Italy;* <sup>3</sup> *Consiglio Nazionale delle Ricerche, Istituto di Scienze Marine Sezione Pesca Marittima, Largo Fiera della Pesca, 60125 Ancona, Italy;* \* Corresponding author

Table S1. Information about loggerhead turtles sampled and analysed in this study.

| Sample Code | SSCP haplotype | D-loop SEQ haplotype | Tissue for DNA extraction | Recovery site                    | Distance from the coast (NM) | Recovery date    | Recovery mode | CCL-nt (cm) | Sex | Weight (kg) |
|-------------|----------------|----------------------|---------------------------|----------------------------------|------------------------------|------------------|---------------|-------------|-----|-------------|
| 101         | 2              | CC-A3.1              | ED                        | Capoiale (Foce Varano)           | 4                            | 17 October 2008  | BT            | 24.5        | /   | 2.1         |
| 102         | 1              | CC-A2.1              | ED                        | Vieste                           | 4                            | 04 December 2008 | BT            | 34          | /   | 5           |
| 109         | 1              | CC-A2.1              | ED                        | Torre a Mare (Bari)              | 4                            | 09 January 2009  | BT            | 47          | /   | 11          |
| 110         | 1              | CC-A2.1              | ED                        | Vieste                           | 4                            | 15 October 2009  | BT            | 39          | /   | 6.8         |
| 113         | 1              | CC-A2.1              | ED                        | Capoiale (Foce Varano)           | 5                            | 22 January 2009  | BT            | 61          | F   | 30.2        |
| 114         | 1              | CC-A2.1              | ED                        | Capoiale (Foce Varano)           | 5                            | 27 January 2009  | BT            | 62          | F   | 31.8        |
| 115         | 1              | CC-A2.1              | ED                        | Manfredonia                      | 5                            | 06 February 2009 | BT            | 69          | F   | 43          |
| 117         | 1              | CC-A2.1              | ED                        | Vieste                           | 5                            | 06 February 2009 | BT            | 44.5        | /   | 10.9        |
| 121         | 1              | CC-A2.1              | ED                        | Manfredonia                      | 4                            | 20 February 2009 | /             | /           | /   | 1           |
| 139         | 1              | CC-A2.1              | ED                        | Manfredonia                      | 3                            | 09 June 2009     | BT            | 60          | M   | 25.6        |
| 144         | 1              | CC-A2.1              | ED                        | Zapponeta                        | 4                            | 14 July 2009     | BT            | 55          | /   | 20.5        |
| 194         | 1              | CC-A2.1              | ED                        | Manfredonia                      | 6                            | 30 December 2009 | BT            | 53.5        | /   | 15          |
| 195         | 2              | CC-A3.1              | ED                        | Vieste                           | 10                           | 14 January 2010  | BT            | 67          | F   | 37          |
| 199         | 1              | CC-A2.1              | ED                        | Vieste                           | 5                            | 24 February 2010 | BT            | 67          | M   | 30          |
| 200         | 1              | CC-A2.1              | ED                        | Margherita di Savoia             | 6                            | 24 March 2010    | BT            | 64          | F   | 35          |
| 244         | 1              | CC-A2.1              | B                         | Manfredonia (Scalo dei Saraceni) | 1                            | 03 November 2011 | BT            | 67          | F   | 40          |

|     |   |         |   |                             |   |                  |    |      |   |     |
|-----|---|---------|---|-----------------------------|---|------------------|----|------|---|-----|
| 246 | 1 | CC-A2.1 | B | Vieste                      | 4 | 03 November 2011 | S  | 43   | / | 12  |
| 283 | 1 | CC-A2.1 | B | Margherita di Savoia        | 8 | 12 December 2011 | BT | 35   | / | 4   |
| 308 | 1 | CC-A2.1 | B | Capoiale (Foce Varano)      | 6 | 30 December 2011 | BT | 57   | M | 28  |
| 320 | 2 | CC-A3.1 | B | Rodi Garganico              | 4 | 11 January 2012  | S  | 31   | / | 2.5 |
| 322 | 1 | CC-A2.1 | B | Vieste                      | 6 | 12 January 2012  | BT | 58   | F | 20  |
| 324 | 1 | CC-A2.1 | B | Vieste (Pugnochiuso)        | 7 | 17 January 2012  | BT | 46   | / | 10  |
| 326 | 6 | CC-A6.1 | B | Capoiale (Foce Varano)      | 4 | 19 January 2012  | BT | 73   | F | 50  |
| 330 | 1 | CC-A2.1 | B | Mattinata                   | 9 | 19 January 2012  | BT | 54.5 | M | 20  |
| 332 | 1 | CC-A2.1 | B | Vieste (Pugnochiuso)        | 6 | 23 January 2012  | BT | 54   | F | 22  |
| 335 | 1 | CC-A2.1 | B | Vieste                      | 5 | 27 January 2012  | BT | 60   | F | 23  |
| 336 | 1 | CC-A2.1 | B | Vieste                      | 6 | 31 January 2012  | BT | 45   | / | 10  |
| 337 | 1 | CC-A2.1 | B | Rodi Garganico              | 4 | 07 February 2012 | S  | 23   | / | 1.5 |
| 339 | 1 | CC-A2.1 | B | Rodi Garganico              | 4 | 10 February 2012 | S  | 39   | / | 10  |
| 340 | 1 | CC-A2.1 | B | Lesina                      | 4 | 17 February 2012 | S  | 58.5 | F | 18  |
| 341 | 1 | CC-A2.1 | B | Vieste                      | 4 | 17 February 2012 | S  | 56   | F | 23  |
| 342 | 1 | CC-A2.1 | B | Vieste                      | 4 | 17 February 2012 | S  | 41   | / | 10  |
| 343 | 1 | CC-A2.1 | B | Rodi Garganico              | 4 | 17 February 2012 | S  | 41   | / | 6   |
| 344 | 1 | CC-A2.1 | B | Vieste                      | 4 | 17 February 2012 | S  | 61   | M | 30  |
| 345 | 1 | CC-A2.1 | B | Capoiale                    | 4 | 17 February 2012 | S  | 66   | F | 35  |
| 346 | 1 | CC-A2.1 | B | Rodi Garganico              | 4 | 17 February 2012 | S  | 61.5 | M | 25  |
| 347 | 1 | CC-A2.1 | B | Vieste                      | 4 | 18 February 2012 | S  | 50   | / | 10  |
| 349 | 1 | CC-A2.1 | B | Vieste                      | 5 | 23 February 2012 | BT | 37.5 | / | 8   |
| 350 | 1 | CC-A2.1 | B | Rodi Garganico (Pantanello) | 4 | 27 February 2012 | S  | 24   | / | 1.5 |
| 351 | 1 | CC-A2.1 | B | Rodi Garganico              | 4 | 28 February 2012 | S  | 22.5 | / | 1.5 |
| 352 | 2 | CC-A3.1 | B | Mattinata                   | 5 | 06 March 2012    | BT | 34   | / | 3.5 |
| 353 | 1 | CC-A2.1 | B | Mattinata                   | 4 | 06 March 2012    | BT | 47   | / | 12  |
| 355 | 1 | CC-A2.1 | B | Vieste                      | 5 | 14 March 2012    | BT | 61.5 | F | 28  |
| 356 | 1 | CC-A2.1 | B | Vieste                      | 5 | 14 March 2012    | BT | 54   | F | 12  |
| 357 | 1 | CC-A2.1 | B | Vieste                      | 5 | 15 March 2012    | BT | 36   | / | 7   |

|     |   |         |   |                                 |     |               |    |      |   |     |
|-----|---|---------|---|---------------------------------|-----|---------------|----|------|---|-----|
| 358 | 1 | CC-A2.1 | B | Mattinata (Mattinatella)        | 10  | 15 March 2012 | BT | 52   | / | 12  |
| 359 | 1 | CC-A2.1 | B | Vieste                          | 5   | 15 March 2012 | BT | 70   | M | 38  |
| 360 | 1 | CC-A2.1 | B | Manfredonia                     | 5   | 20 March 2012 | BT | 42   | / | 11  |
| 361 | 1 | CC-A2.1 | B | Vieste                          | 5   | 20 March 2012 | BT | 38.5 | / | 5   |
| 362 | 1 | CC-A2.1 | B | Mattinata                       | 10  | 20 March 2012 | BT | 56   | / | 21  |
| 363 | 1 | CC-A2.1 | B | Vieste                          | 5   | 20 March 2012 | BT | 63   | F | 30  |
| 364 | 1 | CC-A2.1 | B | Vieste                          | 5   | 20 March 2012 | BT | 70   | F | 45  |
| 365 | 1 | CC-A2.1 | B | Mattinata                       | 5   | 20 March 2012 | BT | 47   | / | 12  |
| 366 | 5 | CC-A2.9 | B | Vieste                          | 5   | 21 March 2012 | BT | 30   | / | 2.5 |
| 367 | 1 | CC-A2.1 | B | Mattinata                       | 5   | 22 March 2012 | BT | 39   | / | 10  |
| 368 | 1 | CC-A2.1 | B | Mattinata/Vieste                | 5   | 22 March 2012 | BT | 62   | F | 35  |
| 370 | 1 | CC-A2.1 | B | Vieste (Pugnochiuso)            | 2.5 | 26 March 2012 | BT | 51   | / | 13  |
| 371 | 1 | CC-A2.1 | B | Vieste                          | 2.5 | 26 March 2012 | BT | 38   | / | 11  |
| 372 | 1 | CC-A2.1 | B | Mattinata                       | 2   | 27 March 2012 | BT | 47   | / | 10  |
| 373 | 1 | CC-A2.1 | B | Mattinata                       | 2   | 27 March 2012 | BT | 75   | M | 65  |
| 374 | 1 | CC-A2.1 | B | Vieste (Pugnochiuso)            | 3   | 27 March 2012 | BT | 62   | M | 29  |
| 375 | 1 | CC-A2.1 | B | Mattinata                       | 2   | 29 March 2012 | BT | 56.5 | / | 20  |
| 376 | 6 | CC-A6.1 | B | Vieste (Pugnochiuso)            | 2   | 29 March 2012 | BT | 42.5 | / | 8   |
| 377 | 1 | CC-A2.1 | B | Mattinata                       | 2   | 29 March 2012 | BT | 34   | / | 6   |
| 378 | 1 | CC-A2.1 | B | Vieste (Pugnochiuso)            | 3   | 02 April 2012 | BT | 30   | / | 2   |
| 379 | 1 | CC-A2.1 | B | Manfredonia                     | 2.5 | 03 April 2012 | BT | 49   | / | 15  |
| 380 | 1 | CC-A2.1 | B | Vieste                          | 2   | 04 April 2012 | BT | 40   | / | 6   |
| 381 | 1 | CC-A2.1 | B | Vignanotica                     | 3   | 04 April 2012 | BT | 42   | / | 7   |
| 382 | 1 | CC-A2.1 | B | Monte Sant'Angelo (Punta Rossa) | 2   | 04 April 2012 | BT | 48.5 | / | 10  |
| 383 | 1 | CC-A2.1 | B | Mattinata                       | 2.5 | 05 April 2012 | BT | 55   | / | 27  |
| 384 | 5 | CC-A2.9 | B | Vieste                          | 3.5 | 05 April 2012 | BT | 69   | / | 40  |
| 385 | 1 | CC-A2.1 | B | Vieste                          | 3   | 11 April 2012 | BT | 40   | / | 7   |
| 386 | 1 | CC-A2.1 | B | Margherita di Savoia            | 3   | 11 April 2012 | BT | 56   | / | 22  |
| 387 | 1 | CC-A2.1 | B | Barletta                        | 3.5 | 11 April 2012 | BT | 44   | / | 8   |

|     |   |         |   |                                  |               |               |    |      |   |    |
|-----|---|---------|---|----------------------------------|---------------|---------------|----|------|---|----|
| 388 | 1 | CC-A2.1 | B | Zapponeta/Manfredonia            | 3             | 12 April 2012 | BT | 52   | / | 20 |
| 389 | 6 | CC-A6.1 | B | Vieste                           | 2             | 13 April 2012 | BT | 62   | F | 30 |
| 390 | 2 | CC-A3.1 | B | Mattinata                        | 3             | 16 April 2012 | BT | 54   | / | 25 |
| 391 | 1 | CC-A2.1 | B | Vieste                           | 2             | 16 April 2012 | BT | 88   | M | 80 |
| 392 | 1 | CC-A2.1 | B | Zapponeta                        | 2             | 19 April 2012 | BT | 56   | / | 18 |
| 393 | 1 | CC-A2.1 | B | Mattinata                        | 2.5           | 26 April 2012 | BT | 60   | F | 26 |
| 394 | 1 | CC-A2.1 | B | Vieste (Pugnochiuso)             | 3             | 26 April 2012 | BT | 53   | M | 18 |
| 395 | 1 | CC-A2.1 | B | Manfredonia                      | 45 min (time) | 30 April 2012 | BT | 79   | M | 90 |
| 396 | 1 | CC-A2.1 | B | Mattinata                        | 5             | 03 May 2012   | BT | 70   | F | 50 |
| 397 | 1 | CC-A2.1 | B | Manfredonia (Scalo dei Saraceni) | 4             | 07 May 2012   | MT | 72   | M | 38 |
| 398 | 1 | CC-A2.1 | B | Mattinata                        | 3             | 14 May 2012   | BT | 42.5 | / | 10 |
| 399 | 1 | CC-A2.1 | B | Mattinata (Baia delle Zagare)    | 3.5           | 16 May 2012   | BT | 70   | F | 45 |
| 400 | 1 | CC-A2.1 | B | Lesina                           | /             | 19 May 2012   | G  | 34   | / | 5  |
| 401 | 1 | CC-A2.1 | B | Zapponeta                        | 4.5           | 22 May 2012   | BT | 53   | F | 20 |
| 402 | 1 | CC-A2.1 | B | Zapponeta                        | 3.5           | 23 May 2012   | BT | 63.5 | F | 35 |
| 403 | 1 | CC-A2.1 | B | Manfredonia                      | 5             | 23 May 2012   | BT | 68   | F | 50 |
| 404 | 1 | CC-A2.1 | B | Manfredonia                      | 4             | 23 May 2012   | BT | 61   | F | 30 |
| 405 | 1 | CC-A2.1 | B | Vignanotica                      | 4             | 28 May 2012   | BT | 46.5 | / | 8  |
| 406 | 1 | CC-A2.1 | B | Manfredonia                      | 5             | 29 May 2012   | BT | 48.5 | / | 15 |
| 407 | 1 | CC-A2.1 | B | Mattinata                        | 5             | 30 May 2012   | BT | 55.5 | / | 20 |
| 408 | 1 | CC-A2.1 | B | Mattinata                        | 4             | 11 June 2012  | BT | 60   | F | 28 |
| 409 | 1 | CC-A2.1 | B | Mattinata (Monte Saraceno)       | 4             | 13 June 2012  | MT | 68   | F | 45 |
| 410 | 1 | CC-A2.1 | B | Vieste                           | 5             | 18 June 2012  | BT | 63   | F | 35 |
| 411 | 1 | CC-A2.1 | B | Zapponeta                        | 4.5           | 18 June 2012  | BT | 53   | / | 18 |
| 412 | 1 | CC-A2.1 | B | Zapponeta                        | 3             | 19 June 2012  | MT | 68   | F | 40 |
| 413 | 1 | CC-A2.1 | B | Mattinata                        | 3             | 20 June 2012  | BT | 33   | / | 3  |
| 414 | 1 | CC-A2.1 | B | Monte Sant'Angelo (Punta Rossa)  | 3             | 21 June 2012  | MT | 69   | F | 40 |
| 415 | 1 | CC-A2.1 | B | Monte Sant'Angelo (Punta Rossa)  | 3             | 21 June 2012  | MT | 67   | F | 40 |
| 416 | 1 | CC-A2.1 | B | Margherita di Savoia             | 4.5           | 21 June 2012  | BT | 53   | / | 18 |

|     |   |                 |   |                                 |     |              |    |      |   |     |
|-----|---|-----------------|---|---------------------------------|-----|--------------|----|------|---|-----|
| 418 | 1 | CC-A2.1         | B | Vieste                          | 4.5 | 29 June 2012 | BT | 86.5 | M | 100 |
| 419 | 1 | CC-A2.1         | B | Margherita di Savoia            | 4.8 | 02 July 2012 | BT | 51   | / | 15  |
| 421 | 1 | CC-A2.1         | B | Margherita di Savoia            | 12  | 09 July 2012 | BT | 61   | F | 32  |
| 422 | 1 | CC-A2.1         | B | Monte Sant'Angelo (Punta Rossa) | 3   | 10 July 2012 | MT | 60   | F | 32  |
| 423 | 1 | CC-A2.1         | B | Monte Sant'Angelo (Punta Rossa) | 3   | 10 July 2012 | MT | 78   | M | 70  |
| 425 | 4 | <b>CC-A71.1</b> | B | Vignanotica                     | 3   | 11 July 2012 | BT | 42   | / | 8   |
| 426 | 1 | CC-A2.1         | B | Vieste                          | 3   | 12 July 2012 | BT | 31   | / | 3   |
| 427 | 1 | CC-A2.1         | B | Manfredonia                     | 3   | 12 July 2012 | BT | 56   | / | 18  |
| 428 | 1 | CC-A2.1         | B | Manfredonia                     | 3   | 12 July 2012 | BT | 59   | M | 23  |
| 430 | 1 | CC-A2.1         | B | Vieste                          | 3.5 | 16 July 2012 | BT | 41.5 | / | 10  |
| 431 | 1 | CC-A2.1         | B | Mattinata                       | 5   | 16 July 2012 | BT | 36   | / | 6.5 |
| 432 | 1 | CC-A2.1         | B | Mattinata                       | 3   | 16 July 2012 | MT | 75   | M | 52  |
| 433 | 1 | CC-A2.1         | B | Margherita di Savoia            | 5   | 16 July 2012 | BT | 66   | M | 40  |
| 434 | 1 | CC-A2.1         | B | Margherita di Savoia            | 4.5 | 18 July 2012 | BT | 61   | M | 26  |
| 435 | 5 | CC-A2.9         | B | Peschici                        | 3   | 20 July 2012 | BT | 34   | / | 3   |
| 436 | 1 | CC-A2.1         | B | Vieste                          | 3   | 24 July 2012 | BT | 43   | / | 9   |
| 437 | 1 | CC-A2.1         | B | Vieste                          | 3   | 24 July 2012 | BT | 36   | / | 6   |
| 438 | 1 | CC-A2.1         | B | Vignanotica                     | 3   | 25 July 2012 | BT | 71   | M | 48  |
| 439 | 1 | CC-A2.1         | B | Mattinata                       | 4   | 25 July 2012 | BT | 37.8 | / | 6   |
| 440 | 1 | CC-A2.1         | B | Mattinata (Mattinatella)        | 4   | 25 July 2012 | BT | 42.5 | / | 10  |
| 441 | 1 | CC-A2.1         | B | Margherita di Savoia            | 4.5 | 25 July 2012 | BT | 60   | F | 24  |
| 443 | 1 | CC-A2.1         | B | Manfredonia                     | 3.5 | 26 July 2012 | BT | 63   | F | 35  |
| 444 | 1 | CC-A2.1         | B | Manfredonia (Pugnochiuso)       | 4   | 26 July 2012 | BT | 63   | F | 35  |
| 445 | 5 | CC-A2.9         | B | Manfredonia (Pugnochiuso)       | 4   | 30 July 2012 | BT | 37.5 | / | 5   |
| 446 | 1 | CC-A2.1         | B | Zapponeta                       | 4   | 30 July 2012 | BT | 58.5 | F | 25  |
| 447 | 1 | CC-A2.1         | B | Zapponeta                       | 4   | 30 July 2012 | BT | 67   | F | 45  |
| 448 | 1 | CC-A2.1         | B | Zapponeta                       | 4   | 30 July 2012 | BT | 80   | M | 65  |
| 449 | 1 | CC-A2.1         | B | Vieste                          | 3   | 30 July 2012 | BT | 29.4 | / | 1.5 |
| 450 | 1 | CC-A2.1         | B | Zapponeta                       | 3   | 31 July 2012 | BT | 59.5 | F | 35  |

|     |   |         |   |                               |     |                   |    |      |   |    |
|-----|---|---------|---|-------------------------------|-----|-------------------|----|------|---|----|
| 452 | 2 | CC-A3.1 | B | Vieste                        | 5   | 02 August 2012    | BT | 72.5 | M | 40 |
| 455 | 1 | CC-A2.1 | B | Mattinata                     | 4   | 04 August 2012    | BT | 62   | F | 30 |
| 458 | 1 | CC-A2.1 | B | Mattinata                     | 4   | 07 August 2012    | S  | 51   | / | 18 |
| 460 | 1 | CC-A2.1 | B | Rodi Garganico                | /   | 20 August 2012    | S  | 36.2 | / | 4  |
| 463 | 1 | CC-A2.1 | B | Mattinata                     | 6   | 18 September 2012 | BT | 52.5 | / | 20 |
| 464 | 1 | CC-A2.1 | B | Zapponeta                     | 4.5 | 18 September 2012 | BT | 71   | F | 50 |
| 465 | 1 | CC-A2.1 | B | Zapponeta                     | 4   | 24 September 2012 | BT | 67   | F | 45 |
| 466 | 6 | CC-A6.1 | B | Mattinata                     | 4   | 24 September 2012 | BT | 54.5 | / | 20 |
| 467 | 1 | CC-A2.1 | B | Zapponeta                     | 4.5 | 25 September 2012 | BT | 63   | F | 40 |
| 468 | 5 | CC-A2.9 | B | Vieste (Pugnochiuso)          | 4   | 25 September 2012 | BT | 31.5 | / | 3  |
| 469 | 1 | CC-A2.1 | B | Zapponeta                     | 4.5 | 25 September 2012 | BT | 65   | M | 40 |
| 470 | 1 | CC-A2.1 | B | Zapponeta                     | 4.5 | 25 September 2012 | BT | 72.5 | M | 60 |
| 471 | 1 | CC-A2.1 | B | Zapponeta                     | 4.5 | 25 September 2012 | BT | 78   | M | 75 |
| 472 | 1 | CC-A2.1 | B | Zapponeta                     | 4.5 | 25 September 2012 | BT | 72   | M | 55 |
| 473 | 1 | CC-A2.1 | B | Zapponeta                     | 4.5 | 25 September 2012 | BT | 63   | F | 35 |
| 474 | 1 | CC-A2.1 | B | Manfredonia (Montitti)        | 3   | 25 September 2012 | BT | 54.5 | / | 20 |
| 475 | 1 | CC-A2.1 | B | Zapponeta                     | 3   | 27 September 2012 | BT | 60   | F | 30 |
| 476 | 1 | CC-A2.1 | B | Zapponeta                     | 3   | 27 September 2012 | BT | 54.5 | / | 25 |
| 477 | 1 | CC-A2.1 | B | Zapponeta                     | 3   | 27 September 2012 | BT | 83   | M | 85 |
| 478 | 1 | CC-A2.1 | B | Zapponeta                     | 3   | 27 September 2012 | BT | 71.5 | / | 55 |
| 479 | 1 | CC-A2.1 | B | Zapponeta                     | 3   | 27 September 2012 | BT | 35   | / | 5  |
| 480 | 5 | CC-A2.9 | B | Vieste                        | 5   | 28 September 2012 | BT | 31   | / | 4  |
| 481 | 1 | CC-A2.1 | B | Manfredonia (Montitti)        | 4   | 01 October 2012   | BT | 75.5 | M | 70 |
| 482 | 1 | CC-A2.1 | B | Manfredonia (Montitti)        | 4   | 01 October 2012   | BT | 55   | / | 15 |
| 483 | 6 | CC-A6.1 | B | Mattinata (Baia delle Zagare) | 4   | 01 October 2012   | BT | 45.5 | / | 9  |
| 484 | 1 | CC-A2.1 | B | Mattinata (Baia delle Zagare) | 4   | 01 October 2012   | BT | 46   | / | 7  |
| 485 | 1 | CC-A2.1 | B | Zapponeta                     | 4   | 02 December 2012  | BT | 59.5 | / | 28 |
| 486 | 2 | CC-A3.1 | B | Mattinata (Mattinatella)      | 6   | 02 October 2012   | BT | 42   | / | 8  |
| 487 | 1 | CC-A2.1 | B | Manfredonia (Montitti)        | 4   | 02 October 2012   | BT | 69   | M | 60 |

|     |   |          |   |                             |     |                 |    |      |   |      |
|-----|---|----------|---|-----------------------------|-----|-----------------|----|------|---|------|
| 488 | 7 | CC-A2.12 | B | Mattinata                   | 4   | 03 October 2012 | BT | 32   | / | 4    |
| 489 | 2 | CC-A3.1  | B | Mattinata                   | 5.5 | 03 October 2012 | BT | 42   | / | 8    |
| 490 | 1 | CC-A2.1  | B | Capoiale                    | 4   | 04 October 2012 | BT | 40   | / | 8    |
| 491 | 1 | CC-A2.1  | B | Peschici                    | 6   | 04 October 2012 | BT | 35.5 | / | 5.8  |
| 492 | 1 | CC-A2.1  | B | Manfredonia (Montitti)      | 4   | 04 October 2012 | BT | 64   | F | 33   |
| 493 | 1 | CC-A2.1  | B | Zapponeta                   | 4   | 08 October 2012 | BT | 66   | F | 32.5 |
| 494 | 1 | CC-A2.1  | B | Manfredonia                 | 4   | 08 October 2012 | BT | 61.5 | F | 33   |
| 495 | 8 | CC-A2.8  | B | Zapponeta                   | 5   | 08 October 2012 | BT | 51   | / | 15.5 |
| 496 | 1 | CC-A2.1  | B | Monte Sant'Angelo (Macchia) | 4   | 09 October 2012 | BT | 58   | / | 21.1 |
| 497 | 1 | CC-A2.1  | B | Monte Sant'Angelo (Macchia) | 4   | 09 October 2012 | BT | 78.5 | M | 80   |
| 498 | 1 | CC-A2.1  | B | Mattinata (Mattinatella)    | 6   | 09 October 2012 | BT | 40.5 | / | 7    |
| 499 | 1 | CC-A2.1  | B | Mattinata                   | 5   | 09 October 2012 | BT | 65   | F | 35.7 |
| 500 | 1 | CC-A2.1  | B | Mattinata                   | 5   | 09 October 2012 | BT | 59   | F | 24   |
| 501 | 1 | CC-A2.1  | B | Vieste (Pugnochiuso)        | 4.5 | 11 October 2012 | BT | 39.8 | / | 7.9  |
| 502 | 1 | CC-A2.1  | B | Zapponeta                   | 4   | 17 October 2012 | BT | 64   | M | 32.5 |
| 503 | 1 | CC-A2.1  | B | Zapponeta                   | 3   | 17 October 2012 | BT | 39.7 | / | 7.5  |
| 504 | 9 | CC-A10.1 | B | Margherita di Savoia        | 5.5 | 17 October 2012 | BT | 64   | F | 28   |
| 505 | 1 | CC-A2.1  | B | Vieste                      | 5.5 | 18 October 2012 | BT | 47   | / | 12   |
| 506 | 1 | CC-A2.1  | B | Zapponeta                   | 4.5 | 18 October 2012 | BT | 70.8 | M | 41   |
| 507 | 1 | CC-A2.1  | B | Zapponeta                   | 4   | 18 October 2012 | BT | 74   | M | 47   |
| 508 | 1 | CC-A2.1  | B | Mattinata                   | 6   | 23 October 2012 | BT | 34.8 | / | 5    |
| 509 | 1 | CC-A2.1  | B | Vieste (Pugnochiuso)        | 6   | 23 October 2012 | BT | 55   | F | 20   |
| 510 | 1 | CC-A2.1  | B | Mattinata (Monte Saraceno)  | 6   | 23 October 2012 | BT | 71.5 | F | 48   |
| 511 | 1 | CC-A2.1  | B | Mattinata (Monte Saraceno)  | 6   | 23 October 2012 | BT | 73   | M | 50   |
| 512 | 1 | CC-A2.1  | B | Mattinata (Monte Saraceno)  | 6   | 23 October 2012 | BT | 78   | F | 75   |
| 513 | 6 | CC-A6.1  | B | Mattinata (Monte Saraceno)  | 6   | 23 October 2012 | BT | 71   | M | 75   |
| 514 | 1 | CC-A2.1  | B | Mattinata (Monte Saraceno)  | 6   | 23 October 2012 | BT | 70   | F | 65   |
| 515 | 1 | CC-A2.1  | B | Mattinata (Monte Saraceno)  | 6   | 23 October 2012 | BT | 74   | M | 44.5 |
| 516 | 1 | CC-A2.1  | B | Vignanotica                 | 5   | 25 October 2012 | BT | 33   | / | 4.1  |

|     |   |          |   |                          |   |                  |    |      |   |      |
|-----|---|----------|---|--------------------------|---|------------------|----|------|---|------|
| 517 | 1 | CC-A2.1  | B | Vignanotica              | 5 | 25 October 2012  | BT | 34.8 | / | 4.8  |
| 518 | 1 | CC-A2.1  | B | Manfredonia              | 5 | 29 October 2012  | BT | 69   | F | 50   |
| 520 | 1 | CC-A2.1  | B | Manfredonia              | 6 | 29 October 2012  | BT | 35.2 | / | 5.6  |
| 522 | 1 | CC-A2.1  | B | Manfredonia              | 4 | 06 November 2012 | BT | 67   | F | 35   |
| 523 | 1 | CC-A2.1  | B | Vignanotica              | 5 | 07 November 2012 | BT | 59.5 | F | 24   |
| 524 | 1 | CC-A2.1  | B | Mattinata                | 4 | 08 November 2012 | BT | 44.5 | / | 12.4 |
| 525 | 3 | CC-A32.1 | B | Zapponeta                | 4 | 12 November 2012 | BT | 36.7 | / | 7    |
| 526 | 2 | CC-A3.1  | B | Zapponeta                | 6 | 13 November 2012 | BT | 56   | / | 22.4 |
| 527 | 1 | CC-A2.1  | B | Mattinata                | 5 | 13 November 2012 | BT | 70   | M | 46.9 |
| 528 | 1 | CC-A2.1  | B | Zapponeta                | 4 | 15 November 2012 | BT | 61.5 | M | 29.5 |
| 529 | 1 | CC-A2.1  | B | Zapponeta                | 5 | 19 November 2012 | BT | 65   | F | 33.6 |
| 530 | 2 | CC-A3.1  | B | Zapponeta                | 5 | 22 November 2012 | BT | 57.2 | M | 21.2 |
| 531 | 1 | CC-A2.1  | B | Zapponeta                | 5 | 26 November 2012 | BT | 52.5 | / | 17.8 |
| 532 | 1 | CC-A2.1  | B | Zapponeta                | 5 | 26 November 2012 | BT | 48   | / | 12.1 |
| 533 | 1 | CC-A2.1  | B | Vieste (Pugnochiuso)     | 5 | 26 November 2012 | BT | 50.5 | / | 13.6 |
| 534 | 1 | CC-A2.1  | B | Margherita di Savoia     | 6 | 27 November 2012 | BT | 67   | F | 34.3 |
| 535 | 1 | CC-A2.1  | B | Vieste                   | 5 | 29 November 2012 | BT | 31.9 | / | 3.7  |
| 536 | 1 | CC-A2.1  | B | Vieste                   | 5 | 29 November 2012 | BT | 39.8 | / | 6.7  |
| 537 | 1 | CC-A2.1  | B | Zapponeta                | 5 | 29 November 2012 | BT | 56.5 | / | 22.4 |
| 538 | 1 | CC-A2.1  | B | Mattinata                | 6 | 03 December 2012 | BT | 38.7 | / | 6    |
| 539 | 1 | CC-A2.1  | B | Mattinata                | 6 | 05 December 2012 | BT | 50   | F | 14   |
| 540 | 5 | CC-A2.9  | B | Mattinata                | 6 | 05 December 2012 | BT | 44   | / | 9.5  |
| 541 | 1 | CC-A2.1  | B | Vieste                   | 6 | 06 December 2012 | BT | 59   | F | 23.3 |
| 542 | 1 | CC-A2.1  | B | Mattinata (Mattinatella) | 5 | 11 December 2012 | BT | 71   | M | 34   |
| 543 | 1 | CC-A2.1  | B | Mattinata (Mattinatella) | 5 | 11 December 2012 | BT | 35.5 | / | 5.4  |
| 544 | 1 | CC-A2.1  | B | Manfredonia              | 6 | 11 December 2012 | BT | 41   | / | 8    |
| 545 | 1 | CC-A2.1  | B | Mattinata                | 6 | 11 December 2012 | BT | 69.5 | F | 42.6 |
| 546 | 1 | CC-A2.1  | B | Mattinata                | 6 | 11 December 2012 | BT | 58   | / | 22   |
| 547 | 1 | CC-A2.1  | B | Vieste                   | 5 | 13 December 2012 | BT | 67   | F | 34   |



|              |   |         |    |                      |     |                  |               |      |   |       |
|--------------|---|---------|----|----------------------|-----|------------------|---------------|------|---|-------|
| <b>548</b>   | 1 | CC-A2.1 | B  | Margherita di Savoia | 5   | 13 December 2012 | BT            | 65   | F | 33.8  |
| <b>549</b>   | 1 | CC-A2.1 | B  | Margherita di Savoia | 5   | 13 December 2012 | BT            | 63   | M | 29    |
| <b>550</b>   | 1 | CC-A2.1 | B  | Vieste (Pugnochiuso) | 6   | 17 December 2012 | BT            | 68   | F | 37.4  |
| <b>551</b>   | 1 | CC-A2.1 | B  | Vieste               | 6   | 17 December 2012 | BT            | 78.2 | M | 68    |
| <b>552</b>   | 1 | CC-A2.1 | B  | Vieste (Pugnochiuso) | 3   | 21 December 2012 | BT            | 63   | F | 28    |
| <b>553</b>   | 1 | CC-A2.1 | B  | Zapponeta            | 4   | 21 December 2012 | BT            | 27   | / | 2.2   |
| <b>554</b>   | 1 | CC-A2.1 | B  | Vieste               | 6   | 22 December 2012 | BT            | 51   | / | 13.6  |
| <b>555</b>   | 1 | CC-A2.1 | B  | Vieste (Pugnochiuso) | 5   | 22 December 2012 | BT            | 49   | / | 13    |
| <b>556</b>   | 1 | CC-A2.1 | B  | Vieste (Pugnochiuso) | 5.5 | 22 December 2012 | BT            | 62   | F | 27.5  |
| <b>557</b>   | 1 | CC-A2.1 | B  | Vieste               | 6   | 22 December 2012 | BT            | /    | / | 21    |
| <b>558</b>   | 1 | CC-A2.1 | B  | Vieste               | 6   | 22 December 2012 | BT            | 76   | M | 70    |
| <b>559</b>   | 1 | CC-A2.1 | B  | Vieste (Pugnochiuso) | 6   | 27 December 2012 | BT            | 67.5 | F | 33.8  |
| <b>560</b>   | 1 | CC-A2.1 | B  | Vieste               | 5   | 28 December 2012 | BT            | 60   | F | 23.3  |
| <b>561</b>   | 1 | CC-A2.1 | B  | Vieste               | 6   | 31 December 2012 | BT            | 53   | / | 20.5  |
| <b>562</b>   | 1 | CC-A2.1 | B  | Vieste               | 6   | 30 December 2012 | BT            | 66   | M | 33.8  |
| <b>617-1</b> | 6 | CC-A6.1 | ED | Vieste               | /   | 11 April 2013    | S             | 10.5 | / | 0.164 |
| <b>620-1</b> | 1 | CC-A2.1 | ED | Vieste               | /   | 12 April 2013    | S             | 12.4 | / | 0.298 |
| <b>681</b>   | 1 | CC-A2.1 | ED | Vieste (San Lorenzo) | /   | 02 October 2013  | S (hatchling) | 4.7* | / | 0.017 |
| <b>682</b>   | 1 | CC-A2.1 | ED | Vieste (Santa Maria) | /   | 04 October 2013  | S (hatchling) | 4.7* | / | 0.017 |
| <b>685</b>   | 1 | CC-A2.1 | ED | Vieste (Santa Maria) | /   | 04 October 2013  | S (hatchling) | 4.7* | / | 0.017 |

ED = Epidermis-Dermis; B = Blood; BT = Bottom Trawling; S = Stranded; G = Gillnetting; MD = Midwater Trawling; CCLn-t = Curved Carapace Length notch-to-tip; F = Female; M = Male. The symbol \* indicates size reported as TCCL (Total Curved Carapace Length). The symbol / indicates missing data.
