# Supplementary material
Source: publisher figshare collection journal article supplement (https://tandf.figshare.com/articles/dataset/_/5683741)
Supplement: Supplementary file 2 [file 1]

|          |   |    |   |   |   |    |   |   |   |   |    |    |   |   |   |   |   |   |   |   |   |   |   |   |
|----------|---|----|---|---|---|----|---|---|---|---|----|----|---|---|---|---|---|---|---|---|---|---|---|---|
| CC-A4.3  | 0 | 0  | 0 | 0 | 0 | 0  | 0 | 0 | 0 | 4 | 0  | 0  | 0 | 0 | 0 | 0 | 0 | 0 | 0 | 0 | 0 | 0 | 0 | 0 |
| CC-A5.1  | 0 | 2  | 0 | 0 | 0 | 2  | 0 | 0 | 0 | 0 | 0  | 0  | 0 | 0 | 0 | 0 | 0 | 0 | 0 | 0 | 0 | 0 | 0 | 0 |
| CC-A6.1  | 0 | 0  | 0 | 0 | 0 | 0  | 0 | 0 | 0 | 0 | 0  | 0  | 5 | 0 | 0 | 0 | 0 | 0 | 0 | 0 | 0 | 0 | 0 | 7 |
| CC-A7.1  | 0 | 7  | 2 | 0 | 0 | 0  | 0 | 6 | 0 | 0 | 0  | 0  | 0 | 0 | 0 | 0 | 0 | 0 | 0 | 0 | 0 | 0 | 0 | 0 |
| CC-A7.2  | 0 | 2  | 0 | 0 | 0 | 0  | 0 | 0 | 0 | 0 | 0  | 0  | 0 | 0 | 0 | 0 | 0 | 0 | 0 | 0 | 0 | 0 | 0 | 0 |
| CC-A8.1  | 0 | 0  | 0 | 0 | 0 | 7  | 0 | 1 | 0 | 0 | 0  | 0  | 0 | 0 | 0 | 0 | 0 | 0 | 0 | 0 | 0 | 0 | 0 | 0 |
| CC-A9.1  | 0 | 2  | 2 | 0 | 2 | 8  | 1 | 1 | 1 | 0 | 0  | 0  | 0 | 0 | 0 | 0 | 0 | 0 | 0 | 0 | 0 | 0 | 0 | 0 |
| CC-A10.1 | 0 | 9  | 7 | 0 | 0 | 41 | 0 | 7 | 0 | 0 | 0  | 0  | 0 | 0 | 0 | 0 | 0 | 0 | 0 | 0 | 0 | 0 | 0 | 1 |
| CC-A10.4 | 0 | 1  | 0 | 0 | 0 | 0  | 0 | 0 | 0 | 0 | 0  | 0  | 0 | 0 | 0 | 0 | 0 | 0 | 0 | 0 | 0 | 0 | 0 | 0 |
| CC-A11.2 | 0 | 0  | 0 | 0 | 0 | 0  | 0 | 0 | 0 | 0 | 1  | 0  | 0 | 0 | 0 | 0 | 0 | 0 | 0 | 0 | 0 | 0 | 0 | 0 |
| CC-A11.3 | 0 | 0  | 0 | 1 | 0 | 7  | 0 | 1 | 0 | 0 | 0  | 0  | 0 | 0 | 0 | 0 | 0 | 0 | 0 | 0 | 0 | 0 | 0 | 0 |
| CC-A11.5 | 0 | 0  | 0 | 0 | 0 | 1  | 0 | 0 | 0 | 0 | 0  | 0  | 0 | 0 | 0 | 0 | 0 | 0 | 0 | 0 | 0 | 0 | 0 | 0 |
| CC-A11.6 | 0 | 0  | 0 | 0 | 0 | 0  | 0 | 0 | 0 | 0 | 0  | 0  | 0 | 0 | 0 | 0 | 0 | 0 | 0 | 0 | 0 | 0 | 7 | 0 |
| CC-A12.1 | 0 | 0  | 0 | 0 | 0 | 2  | 0 | 0 | 0 | 0 | 0  | 0  | 0 | 0 | 0 | 0 | 0 | 0 | 0 | 0 | 0 | 0 | 0 | 0 |
| CC-A13.1 | 0 | 1  | 1 | 0 | 0 | 0  | 0 | 2 | 0 | 0 | 0  | 0  | 0 | 0 | 0 | 0 | 0 | 1 | 0 | 0 | 0 | 0 | 0 | 0 |
| CC-A14.1 | 0 | 15 | 1 | 0 | 0 | 7  | 1 | 5 | 0 | 0 | 0  | 0  | 0 | 0 | 0 | 0 | 0 | 0 | 0 | 0 | 0 | 0 | 0 | 0 |
| CC-A17.1 | 0 | 0  | 0 | 0 | 0 | 0  | 0 | 0 | 0 | 0 | 60 | 0  | 0 | 0 | 0 | 0 | 0 | 0 | 0 | 0 | 0 | 0 | 0 | 0 |
| CC-A17.2 | 0 | 0  | 0 | 0 | 0 | 0  | 0 | 0 | 0 | 0 | 7  | 0  | 0 | 0 | 0 | 0 | 0 | 0 | 0 | 0 | 0 | 0 | 0 | 0 |
| CC-A20.1 | 0 | 2  | 2 | 0 | 0 | 0  | 5 | 1 | 0 | 0 | 0  | 17 | 0 | 0 | 0 | 0 | 0 | 0 | 0 | 0 | 0 | 0 | 0 | 0 |
| CC-A21.1 | 0 | 0  | 0 | 0 | 0 | 0  | 0 | 2 | 0 | 0 | 0  | 0  | 0 | 0 | 0 | 0 | 0 | 0 | 0 | 0 | 0 | 0 | 0 | 0 |
| CC-A24.1 | 0 | 0  | 0 | 0 | 0 | 0  | 0 | 0 | 0 | 5 | 0  | 0  | 0 | 0 | 0 | 0 | 0 | 0 | 0 | 0 | 0 | 0 | 0 | 0 |
| CC-A26.1 | 0 | 0  | 0 | 0 | 0 | 0  | 0 | 0 | 0 | 0 | 0  | 0  | 0 | 0 | 0 | 0 | 0 | 0 | 0 | 0 | 1 | 0 | 0 | 0 |
| CC-A27.1 | 0 | 0  | 0 | 0 | 0 | 0  | 0 | 0 | 1 | 0 | 0  | 0  | 0 | 0 | 0 | 0 | 0 | 0 | 0 | 0 | 0 | 0 | 0 | 0 |
| CC-A29.1 | 0 | 0  | 0 | 0 | 0 | 0  | 0 | 0 | 0 | 0 | 0  | 0  | 0 | 0 | 0 | 0 | 0 | 0 | 0 | 2 | 0 | 0 | 0 | 0 |
| CC-A31.1 | 0 | 0  | 0 | 0 | 0 | 0  | 0 | 0 | 0 | 0 | 0  | 2  | 1 | 0 | 0 | 0 | 0 | 0 | 0 | 0 | 0 | 0 | 0 | 0 |
| CC-A32.1 | 0 | 0  | 0 | 0 | 0 | 0  | 0 | 0 | 0 | 0 | 0  | 0  | 1 | 0 | 0 | 0 | 0 | 0 | 0 | 0 | 0 | 0 | 0 | 1 |
| CC-A36.1 | 0 | 1  | 0 | 0 | 0 | 0  | 0 | 0 | 0 | 0 | 0  | 0  | 0 | 0 | 0 | 0 | 0 | 0 | 0 | 0 | 0 | 0 | 0 | 0 |
| CC-A36.2 | 0 | 0  | 0 | 0 | 0 | 1  | 0 | 1 | 0 | 0 | 0  | 0  | 0 | 0 | 0 | 0 | 0 | 0 | 0 | 0 | 0 | 0 | 0 | 0 |
| CC-A41.1 | 0 | 1  | 0 | 0 | 0 | 0  | 0 | 0 | 0 | 0 | 0  | 0  | 0 | 0 | 0 | 0 | 0 | 0 | 0 | 0 | 0 | 0 | 0 | 0 |
| CC-A42.1 | 0 | 0  | 0 | 0 | 0 | 1  | 0 | 0 | 0 | 0 | 0  | 0  | 0 | 0 | 0 | 0 | 0 | 0 | 0 | 0 | 0 | 0 | 0 | 0 |
| CC-A43.1 | 0 | 0  | 1 | 0 | 0 | 0  | 0 | 0 | 0 | 0 | 0  | 0  | 0 | 0 | 0 | 0 | 0 | 0 | 0 | 0 | 0 | 0 | 0 | 0 |
| CC-A47.1 | 0 | 0  | 0 | 0 | 0 | 0  | 0 | 0 | 0 | 0 | 1  | 0  | 0 | 0 | 0 | 0 | 0 | 0 | 0 | 0 | 0 | 0 | 0 | 0 |
| CC-A50.1 | 0 | 0  | 0 | 0 | 0 | 0  | 0 | 0 | 0 | 0 | 0  | 0  | 0 | 0 | 0 | 0 | 0 | 1 | 0 | 0 | 0 | 0 | 0 | 0 |

|                 |   |   |   |   |   |   |   |   |   |   |   |   |   |   |   |   |   |   |   |   |   |   |   |   |
|-----------------|---|---|---|---|---|---|---|---|---|---|---|---|---|---|---|---|---|---|---|---|---|---|---|---|
| <b>CC-A51.1</b> | 0 | 0 | 0 | 0 | 0 | 0 | 2 | 0 | 0 | 0 | 0 | 0 | 0 | 0 | 0 | 0 | 0 | 0 | 0 | 0 | 0 | 0 | 0 | 0 |
| <b>CC-A52.1</b> | 0 | 0 | 0 | 0 | 0 | 0 | 0 | 0 | 0 | 0 | 0 | 0 | 0 | 0 | 0 | 0 | 2 | 0 | 0 | 0 | 0 | 0 | 0 | 0 |
| <b>CC-A53.1</b> | 0 | 0 | 0 | 0 | 0 | 0 | 0 | 0 | 0 | 0 | 0 | 0 | 0 | 0 | 0 | 0 | 2 | 0 | 0 | 0 | 0 | 0 | 0 | 0 |
| <b>CC-A59.1</b> | 0 | 0 | 0 | 0 | 0 | 0 | 0 | 0 | 1 | 0 | 0 | 0 | 0 | 0 | 0 | 0 | 0 | 0 | 0 | 0 | 0 | 0 | 0 | 0 |
| <b>CC-A60.1</b> | 0 | 0 | 0 | 0 | 0 | 1 | 0 | 0 | 0 | 0 | 0 | 0 | 0 | 0 | 0 | 0 | 0 | 0 | 0 | 0 | 0 | 0 | 0 | 0 |
| <b>CC-A65.1</b> | 0 | 0 | 0 | 0 | 0 | 0 | 0 | 0 | 0 | 0 | 0 | 0 | 0 | 0 | 0 | 0 | 0 | 0 | 0 | 0 | 2 | 0 | 0 | 0 |

Acronyms indicate: GEO (Cape Island, South Carolina + Ossabaw Island, Georgia), FLO1 (Canaveral National Seashore, Florida + Melbourne Beach, Florida), FLO2 (Juno Beach, Florida + Ft. Lauderdale, Florida), CSL(Cay Sal, Bahamas), DRT (Drt Tortugas, Florida), MEX (Isla Cozumel, Mexico + Quintana Roo mainland, Mexico), KEY (Keewaydin Island, Florida), CSK (Casey Key, Florida), FLO3 (St. George Island, Florida + Cape San Blas, Florida), BRA (Sergipe, Brazil + Bahia, Brazil + Espírito Santo, Brazil + Rio de Janeiro, Brazil), CAP (Boa Vista, Cape Verde + Sal, Cape Verde + Santa Luzia, Cape Verde + Maio, Cape Verde), CAL (Calabria, Italy), GRE (Zakynthos Island, Greece + Kyparissia, Greece + Lakonikos, Greece), CRT (Rethymno, Crete), DLY (Dalyan, Turkey), DAL (Dalaman, Turkey), TKW (western Turkey), TME (middle Turkey + eastern Turkey), CYP (Alagadi, Cyprus + Akamas, Cyprus), LIR (El Mansouri, Lebanon + Israel), LYB (Sirte, Lybia + Misurata, Lybia), NAT (Tongaland, KwaZulu-Natal, South Africa), MAS (Masirah, Oman), MIX-ALL (Gulf of Manfredonia, feeding ground analysed in this study).
